# Supplementary material for: Transcription Factor CaSBP12 Negatively Regulates Salt Stress Tolerance in Pepper (Capsicum annuum L.)
Source: PubMed Central journal article supplement (PMC7013666; doi:10.3390/ijms21020444), 2020-01-10
Supplement: ijms-21-00444-s001.pdf [file ijms-21-00444-s001.pdf]

**Figure S1.** The expression profile of *CaSBP12* gene under salt stress in pepper. After 400 mM NaCl treatment, the expression of *CaSBP12* was detected at 0h, 2h, 4h, 8h, 12h, and 24h. h: hour. \* and \*\* represent significant differences at  $P \leq 0.05$  and  $P \leq 0.01$  respectively. Mean values and SDs for three replicates are shown.

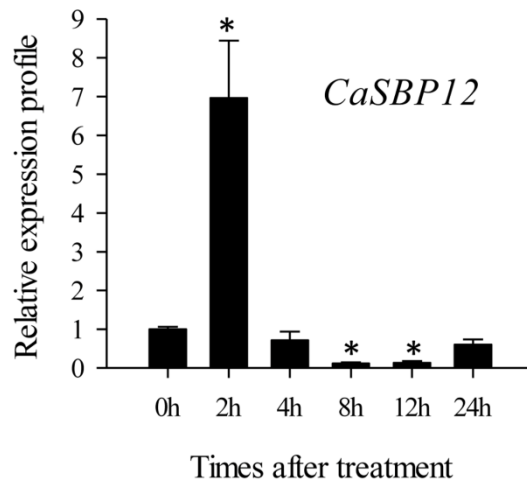

**Figure S2.** The total chlorophyll contents of CaPDS-silenced, CaSBP12-silenced, and control plants after forty days post-infiltration. Bars with different letters indicate significant differences at  $P \leq 0.05$ . Mean values and SDs for three replicates are shown.

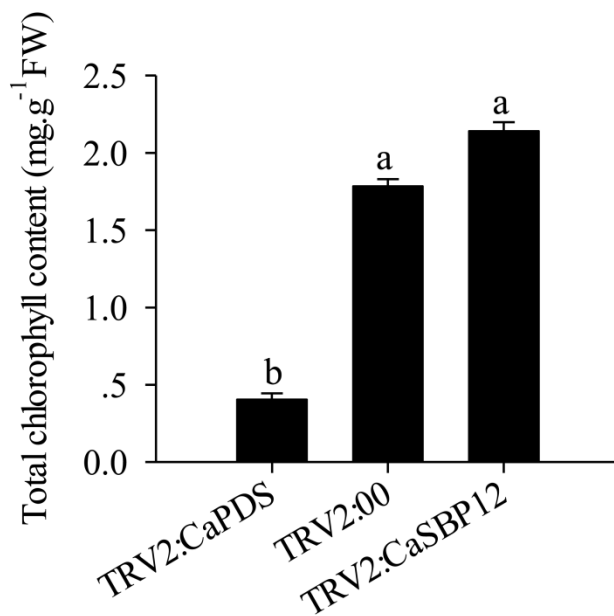

**Figure S3.** The expression level of ion transport genes in *CaSBP12*-silenced and control plants without any treatment were measured using quantitative real-time PCR. *CaSOS1*: CA08g01100; *CaHKT2-1*: CA07g09810; *CaHKT2-2*: CA01g10660. Bars with different letters indicate significant differences at  $P \leq 0.05$ . Mean values and SDs for three replicates are shown.

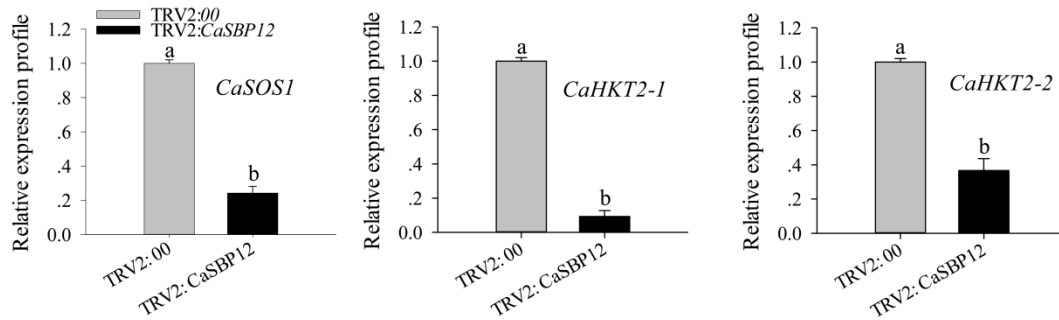

**Figure S4.** The expression of *CaSBP12* gene in transgenic lines and wild-type lines of *Nicotiana benthamiana*. The expression of *CaSBP12* gene in transgenic lines and wild-type lines of *Nicotiana benthamiana* was measured using quantitative real-time PCR. \*\* represent significant differences at  $P \leq 0.01$  respectively. Mean values and SDs for three replicates are shown.

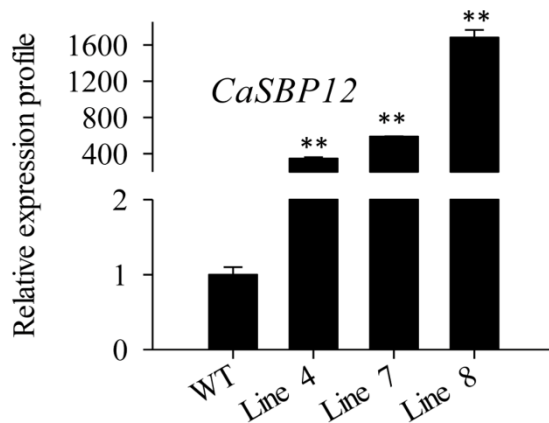

**Figure S5.** The expression level of *NbSOS1* (Niben101Scf02321g00027.1) gene in transgenic lines and wild-type lines of *Nicotiana benthamiana* was measured using quantitative real-time PCR without any treatment. Bars with different letters indicate significant differences at  $P \leq 0.05$ . Mean values and SDs for three biologic replicates are shown.

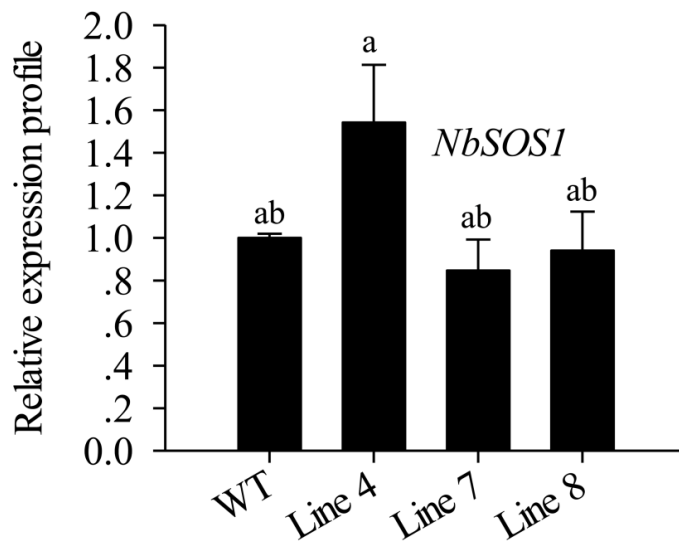

**Table S1.** The detail data of damage severity index percentage of transgenic (line 4, line 7, and line 8) and wild-type plants after salt stress twenty-two days.

|        | 0 level plants | 1 level plants | 2 level plants | 3 level plants | Total number of treatment plants | Damage severity index percentage |
|--------|----------------|----------------|----------------|----------------|----------------------------------|----------------------------------|
| WT     | 3              | 8              | 8              | 1              | 20                               | 45.00                            |
| Line 4 | 3              | 1              | 8              | 8              | 20                               | 68.33                            |
| Line 7 | 0              | 5              | 6              | 10             | 21                               | 74.60                            |
| Line 8 | 1              | 4              | 14             | 6              | 25                               | 66.67                            |
| WT     | 1              | 15             | 5              | 0              | 21                               | 39.68                            |
| Line 4 | 0              | 0              | 11             | 10             | 21                               | 82.54                            |
| Line 7 | 0              | 3              | 15             | 3              | 21                               | 66.67                            |
| Line 8 | 0              | 9              | 7              | 5              | 21                               | 60.31                            |

**Table S2.** Primers names and their sequences used for vector construction in this study.

| Olig name      | Primer Abbreviation | Primer Sequence (5'3')         |
|----------------|---------------------|--------------------------------|
| <i>CaSBP12</i> | CaSBP12-VIGS-F      | CGGGATCCATCCTCCGTTATGCTTCTGGC  |
|                | CaSBP12-VIGS-R      | GGGGTACCTACCTTGGGAATGGGTGAAACA |
| <i>CaSBP12</i> | CaSBP12-PBI121-F    | GCTCTAGAATGTTGGACTATGACTGGGGAG |
|                | CaSBP12-PBI121-R    | CGGGATCCTGGTCTTTGCCTAAAACAATCC |

**Table S3.** Primers names and their sequences used in this study for quantitative real-time PCR.

| Olig name         | Primer Abbreviation | Primer Sequence (5'3')      | Gene amplification length(bp) | Location of each primer |
|-------------------|---------------------|-----------------------------|-------------------------------|-------------------------|
| <i>CaSBP12</i>    | RTCaSBP12-VIGS-F    | GT TTCACCCATTCCAAGGTAATT    | 213                           | exon                    |
|                   | RTCaSBP12-VIGS-R    | TAGTACGTCGGTAAAGTCGATTAACAA |                               |                         |
| <i>CaActin2</i>   | CaActin2-F          | TCCACCTCTTCACTCTCTGCTC      | 213                           | exon                    |
|                   | CaActin2-R          | TGACCCATCCCTACCATAACAC      |                               |                         |
| <i>CaAPX</i>      | CaAPX-F             | AGAGGACAAGCCAGAACCAC        | 271                           | exon                    |
|                   | CaAPX-R             | CCTTGTCTGATGGCAACTGT        |                               |                         |
| <i>CaCAT2</i>     | CaCAT2-F            | GAAGCCAAATCCTAAGTCCC        | 258                           | exon                    |
|                   | CaCAT2-R            | CCAACTCGGATTGCCTCTT         |                               |                         |
| <i>CaSOD</i>      | CaSOD-F             | TATGGAGCCTTAGAACCTGC        | 173                           | exon                    |
|                   | CaSOD-R             | CCATTGAACTTGATAGCACCT       |                               |                         |
| <i>CaPOD</i>      | CaPOD-F             | TCCTCCTCCTACTTCTAACC        | 302                           | exon                    |
|                   | CaPOD-F             | ACAGACCTCTTTGCTCACT         |                               |                         |
| <i>CaSOS1</i>     | CaSOS1-F            | GTTCGTGTCTCGTTTCCGC         | 163                           | exon                    |
|                   | CaSOS1-R            | TCAAATCGGTCTGAACAGCATC      |                               |                         |
| <i>CaHKT2-1</i>   | CaHKT2-1-F          | GGCATTCAATCAGTTCAGTTTGT     | 231                           | exon                    |
|                   | CaHKT2-1-R          | TTATCAACAGGCAAAAAAGTAGTAGAG |                               |                         |
| <i>CaHKT2-2</i>   | CaHKT2-2-F          | AAACACAGTGTATTGCAGAACAACGAT | 77                            | exon                    |
|                   | CaHKT2-2-R          | TCAAGATTATGAAGACCTTACCATTA  |                               |                         |
| <i>Nbactin-97</i> | Nbactin-F           | TATGGAAACATTGTGCTCAGTGG     | 218                           | Exon                    |
|                   | Nbactin-R           | CCAGATTCGTCATACTCTGCC       |                               |                         |
| <i>NbAPX</i>      | NbAPX-F             | CCAAGGGTTCTGACCATCTG        | 304                           | exon                    |
|                   | NbAPX-R             | GCATAGTCGGCAAAGAAAGC        |                               |                         |
| <i>NbCAT1</i>     | NbCAT1-RT-F         | TCTATTGTGGTTCCAGGGGTTT      | 375                           | exon                    |
|                   | NbCAT-RT-R          | CACCCACCGACGAATAAAGC        |                               |                         |
| <i>NbSOD</i>      | NbSOD-RT-F          | GCAGACGGACCTTAGCAACA        | 230                           | exon                    |
|                   | NbSOD-RT-R          | TGGCGACGGTAGGAGCAT          |                               |                         |
| <i>NbPOD</i>      | NbPOD-RT-F          | AGGCTCAGGGACAACAACCT        | 194                           | exon                    |
|                   | NbPOD-RT-R          | TCACAAAATCAGTGGCGAAA        |                               |                         |
| <i>NbSOS1</i>     | NbSOS1-F            | TCCCTTGGGGCAGTGG            | 200                           | exon                    |
|                   | NbSOS1-F            | GCTACAGCTGAGTAGAACATCCC     |                               |                         |
